# Supplementary material for: Anisotropic nodal loop in NiB2 monolayer with nonsymmorphic configuration
Source: Royal Society of Chemistry journal article supplement (doi:10.1039/d1nr07079g), 2021-12-22
Supplement: d1nr07079g1.pdf [file d1nr07079g1.pdf]

# Supporting Information for

## Anisotropic Nodal Loop in NiB<sub>2</sub> Monolayer with Nonsymmorphic Configuration

Qian Xia,<sup>†a</sup> Yang Hu,<sup>†a</sup> Ya-ping Wang,<sup>b</sup> Chang-wen Zhang,<sup>a</sup> Miao-juan Ren,<sup>a</sup> Sheng-shi Li<sup>\*a</sup> and Wei-xiao Ji<sup>\*a</sup>

<sup>a</sup> Spintronics Institute, School of Physics and Technology, University of Jinan, Jinan, Shandong 250022, P. R. China

<sup>b</sup> State Key Laboratory of Crystal Materials and Institute of Crystal Materials, Shandong University, Jinan, Shandong 250100, P. R. China

<sup>†</sup> These authors contributed equally to this work.

\* Corresponding authors

**Table S1** Calculated Fermi velocity ( $v_F$ ) and effective mass of electron ( $m_e^*$ ) at different band crossings for free standing and stressed NiB<sub>2</sub> monolayer.

| Type of strains                          | coefficient of strain |             | P <sub>1</sub>            | P <sub>2</sub>            | P <sub>3</sub>            |
|------------------------------------------|-----------------------|-------------|---------------------------|---------------------------|---------------------------|
| <i>None</i>                              | 0%                    | $v_F$ (m/s) | $5.56 \times 10^5$ m/s    | $1.16 \times 10^6$ m/s    | $6.90 \times 10^5$ m/s    |
|                                          |                       | $ m_e^* $   | $4.70 \times 10^{-5} m_0$ | $2.50 \times 10^{-5} m_0$ | $2.85 \times 10^{-5} m_0$ |
| <i>Uniaxial strain along a direction</i> | 4%                    | $v_F$ (m/s) | $7.38 \times 10^5$ m/s    | $1.13 \times 10^6$ m/s    | $8.19 \times 10^5$ m/s    |
|                                          |                       | $ m_e^* $   | $3.51 \times 10^{-5} m_0$ | $2.58 \times 10^{-5} m_0$ | $2.30 \times 10^{-5} m_0$ |
| <i>Uniaxial strain along b direction</i> | 6%                    | $v_F$ (m/s) | $7.36 \times 10^5$ m/s    | $6.68 \times 10^5$ m/s    | $7.78 \times 10^5$ m/s    |
|                                          |                       | $ m_e^* $   | $3.51 \times 10^{-5} m_0$ | $4.37 \times 10^{-5} m_0$ | $2.38 \times 10^{-5} m_0$ |
| <i>Uniaxial strain along a direction</i> | 4%                    | $v_F$ (m/s) | $7.83 \times 10^5$ m/s    | $1.14 \times 10^6$ m/s    | $7.16 \times 10^5$ m/s    |
|                                          |                       | $ m_e^* $   | $3.24 \times 10^{-5} m_0$ | $2.47 \times 10^{-5} m_0$ | $2.74 \times 10^{-5} m_0$ |
| <i>Uniaxial strain along b direction</i> | 6%                    | $v_F$ (m/s) | $7.91 \times 10^5$ m/s    | $1.12 \times 10^6$ m/s    | $7.11 \times 10^5$ m/s    |
|                                          |                       | $ m_e^* $   | $3.16 \times 10^{-5} m_0$ | $2.46 \times 10^{-5} m_0$ | $2.76 \times 10^{-5} m_0$ |
| <i>Biaxial strain</i>                    | 4%                    | $v_F$ (m/s) | $5.64 \times 10^5$ m/s    | $1.19 \times 10^6$ m/s    | $7.83 \times 10^5$ m/s    |
|                                          |                       | $ m_e^* $   | $4.46 \times 10^{-5} m_0$ | $2.36 \times 10^{-5} m_0$ | $2.41 \times 10^{-5} m_0$ |
| <i>Biaxial strain</i>                    | 6%                    | $v_F$ (m/s) | $7.48 \times 10^5$ m/s    | $1.19 \times 10^6$ m/s    | $8.18 \times 10^5$ m/s    |
|                                          |                       | $ m_e^* $   | $3.30 \times 10^{-5} m_0$ | $2.32 \times 10^{-5} m_0$ | $2.27 \times 10^{-5} m_0$ |

Table S2 Calculated magnetic ground state of MB<sub>2</sub> (M=Sc, Ti, V, Cr, Mn, Fe, Co, Cu, Zn) monolayers.

| Structures       | Magnetic ground state   | Notes                                           |
|------------------|-------------------------|-------------------------------------------------|
| ScB <sub>2</sub> | Nonmagnetic state       | /                                               |
| TiB <sub>2</sub> | Nonmagnetic state       | /                                               |
| VB <sub>2</sub>  | Ferromagnetic state     | $E(\text{FM}) - E(\text{AFM}) = -0.30\text{eV}$ |
|                  |                         | $E(\text{FM}) - E(\text{NM}) = -0.89\text{eV}$  |
| CrB <sub>2</sub> | Ferromagnetic state     | $E(\text{FM}) - E(\text{AFM}) = -1.48\text{eV}$ |
|                  |                         | $E(\text{FM}) - E(\text{NM}) = -3.20\text{eV}$  |
| MnB <sub>2</sub> | Antiferromagnetic state | $E(\text{AFM}) - E(\text{FM}) = -0.20\text{eV}$ |
|                  |                         | $E(\text{AFM}) - E(\text{NM}) = -5.07\text{eV}$ |
| FeB <sub>2</sub> | Antiferromagnetic state | $E(\text{AFM}) - E(\text{FM}) = -0.22\text{eV}$ |
|                  |                         | $E(\text{AFM}) - E(\text{NM}) = -3.95\text{eV}$ |
| CoB <sub>2</sub> | Ferromagnetic state     | $E(\text{FM}) - E(\text{AFM}) = -0.05\text{eV}$ |
|                  |                         | $E(\text{FM}) - E(\text{NM}) = -1.90\text{eV}$  |
| CuB <sub>2</sub> | Nonmagnetic state       | /                                               |
| ZnB <sub>2</sub> | Nonmagnetic state       | /                                               |

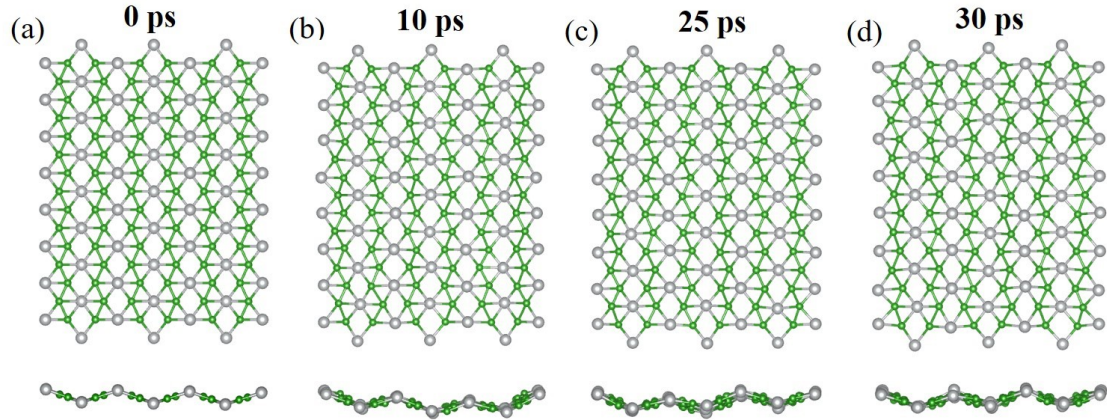

**Fig. S1** (a-d) Snapshots of geometric structure for NiB<sub>2</sub> monolayer during AIMD simulation at 0ps, 10ps, 25ps and 30ps, respectively.

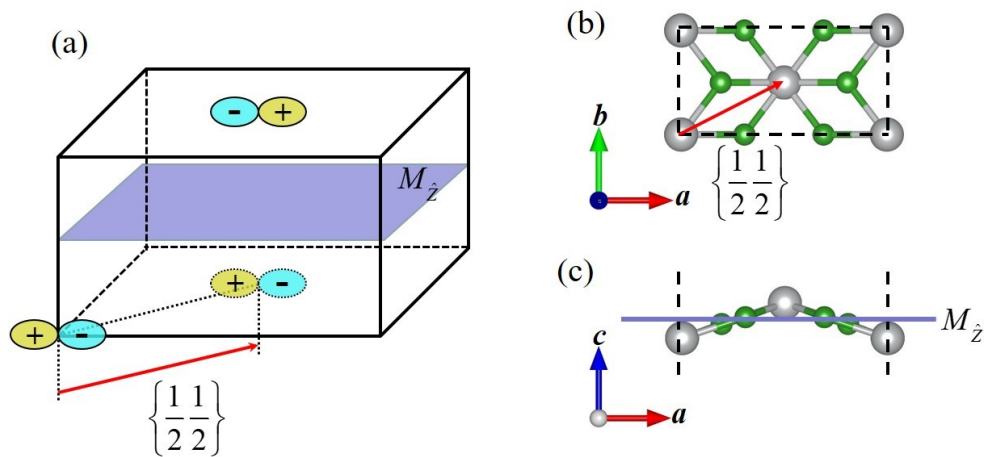

**Fig. S2** (a) Schematic diagram of glide mirror symmetry in NiB<sub>2</sub> monolayer. The yellow and cyan parts represent the wave function whose eigenvalue under the operation of glide mirror is  $-i$ . (b) The corresponding operation diagram in NiB<sub>2</sub> monolayer.

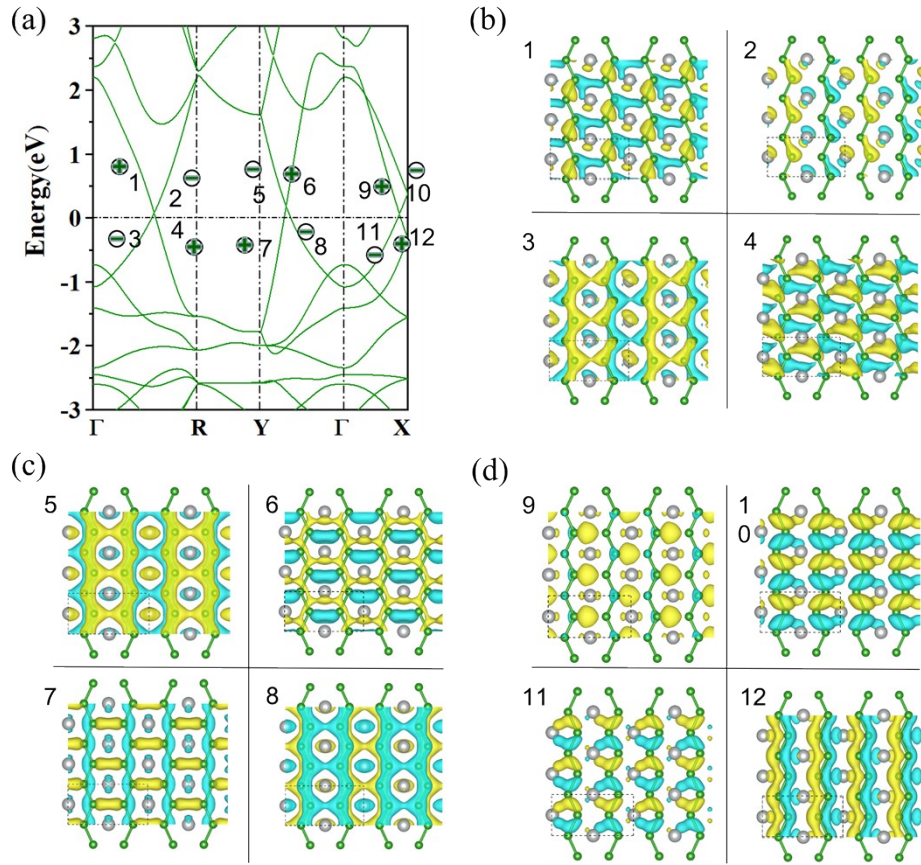

**Fig. S3** (a) Calculated band structure of NiB<sub>2</sub> monolayer. (b-d) Real part of Kohn-Sham wave functions near band crossing points.

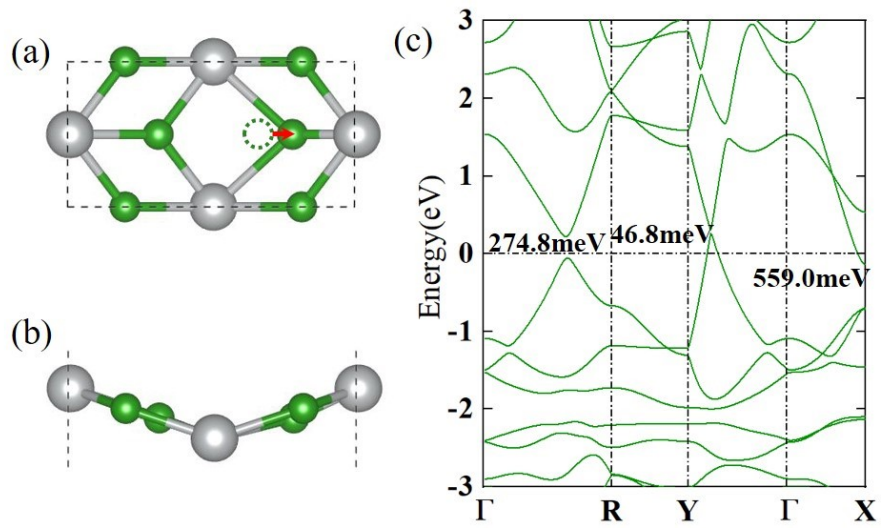

**Fig. S4** (a-b) Top and side views of geometric structure for distorted NiB<sub>2</sub> monolayer. The green dotted line represents the equilibrium position of B atom. (c) The band structure of distorted NiB<sub>2</sub> monolayer.

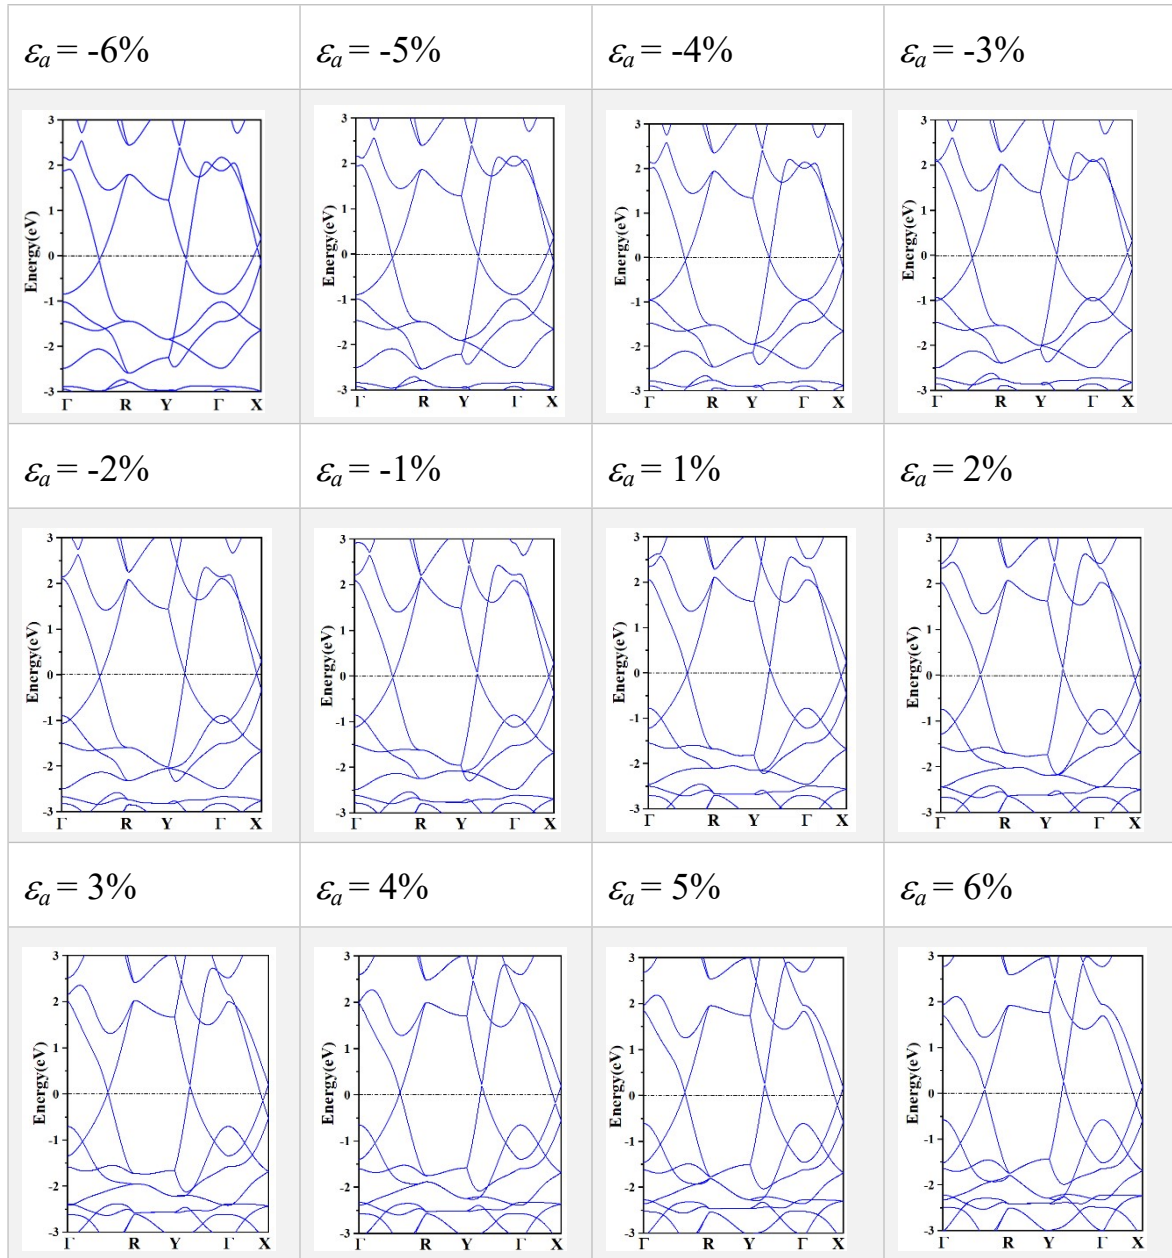

**Fig. S5** Obtained band structures of NiB<sub>2</sub> monolayer under uniaxial strain along *a* direction.



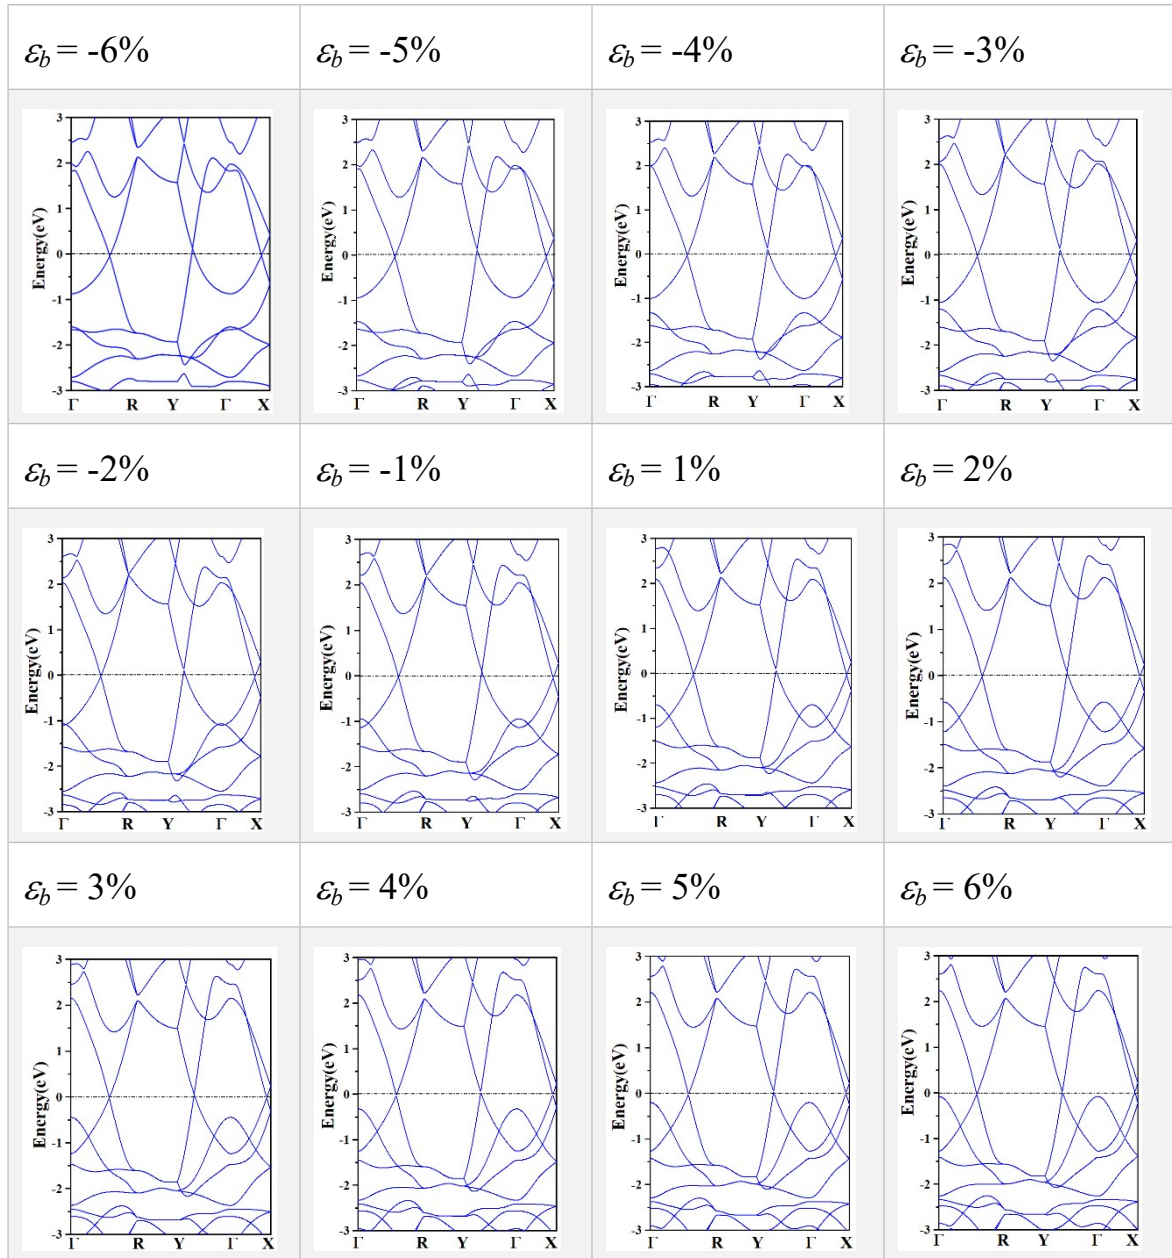

**Fig. S6** Obtained band structures of NiB<sub>2</sub> monolayer under uniaxial strain along *b* direction.

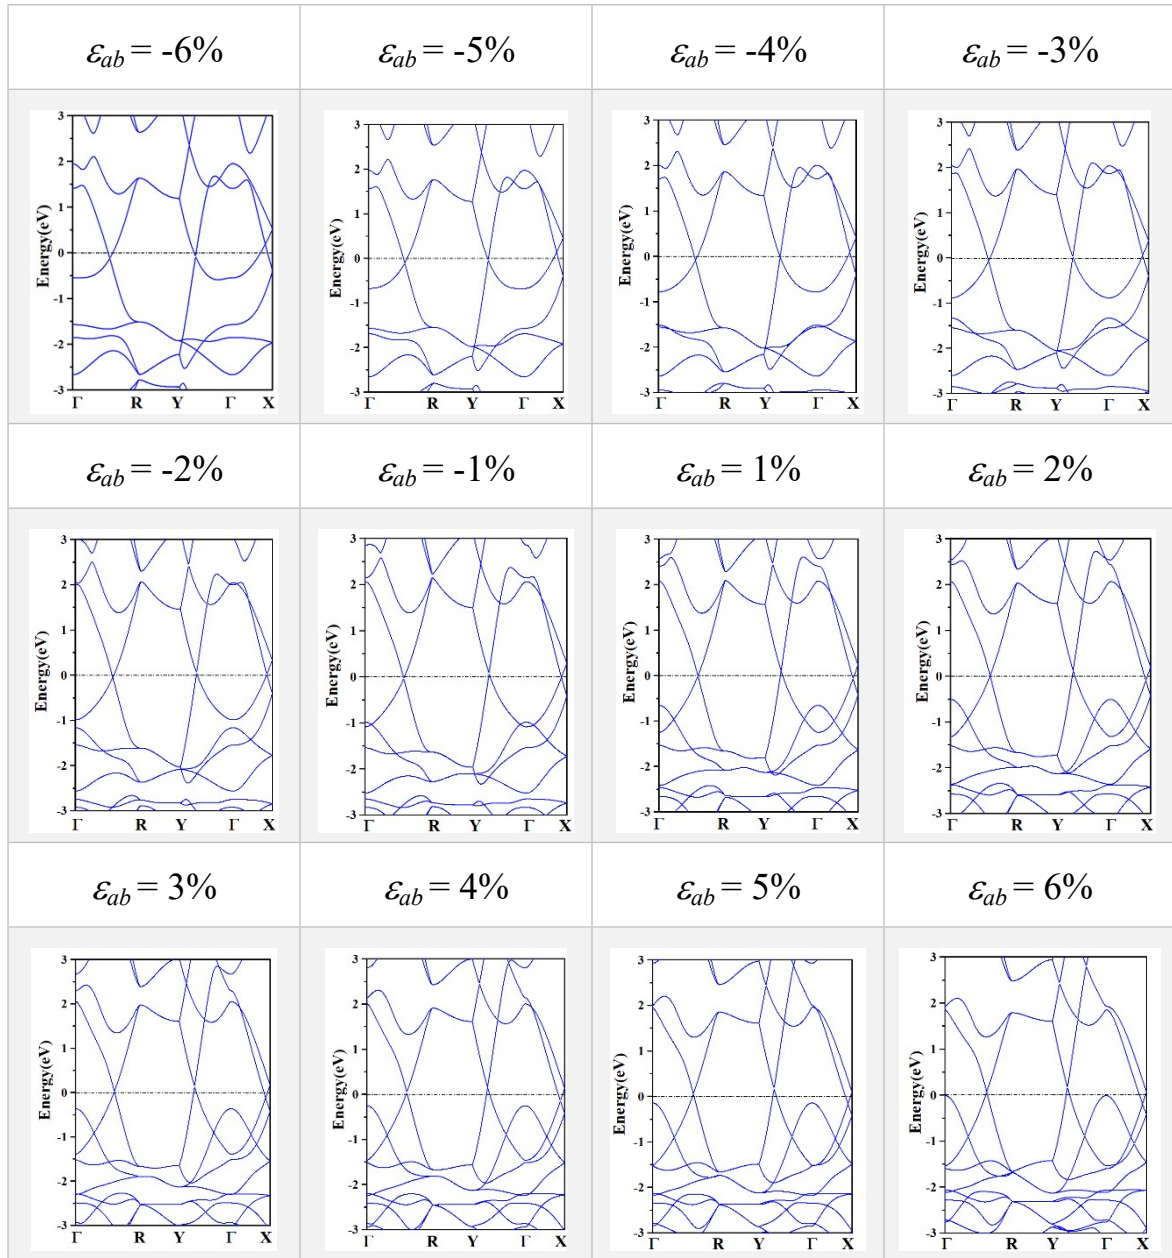

**Fig. S7** Obtained band structures of NiB<sub>2</sub> monolayer under biaxial strain.



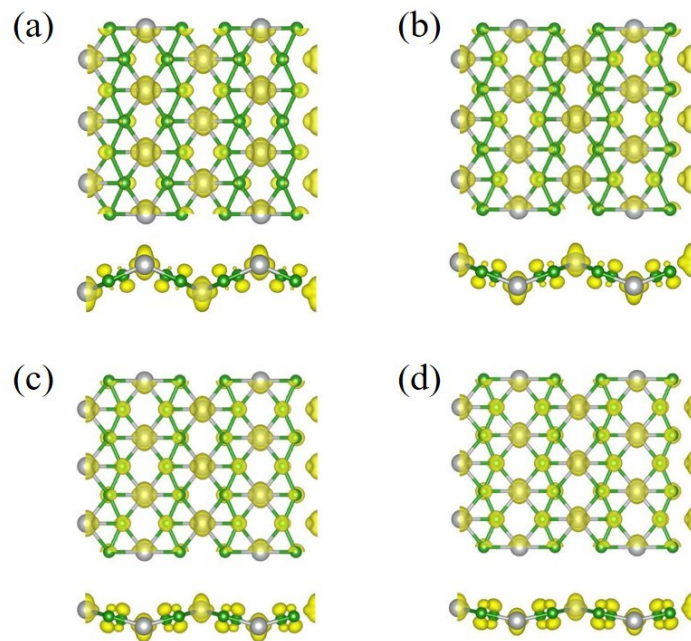

**Fig. S8** The partial charge density of band crossing point P2 under different  $a$ -axial strain: (a) -6%, (b) -3%, (c) 3%, (d) 6%.

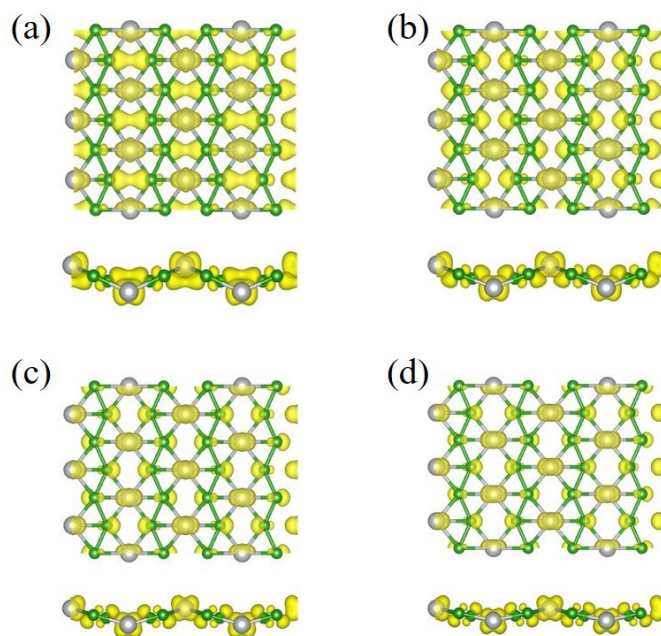

**Fig. S9** The partial charge density of band crossing point P3 under different  $a$ -axial strain: (a) -6%, (b) -3%, (c) 3%, (d) 6%.

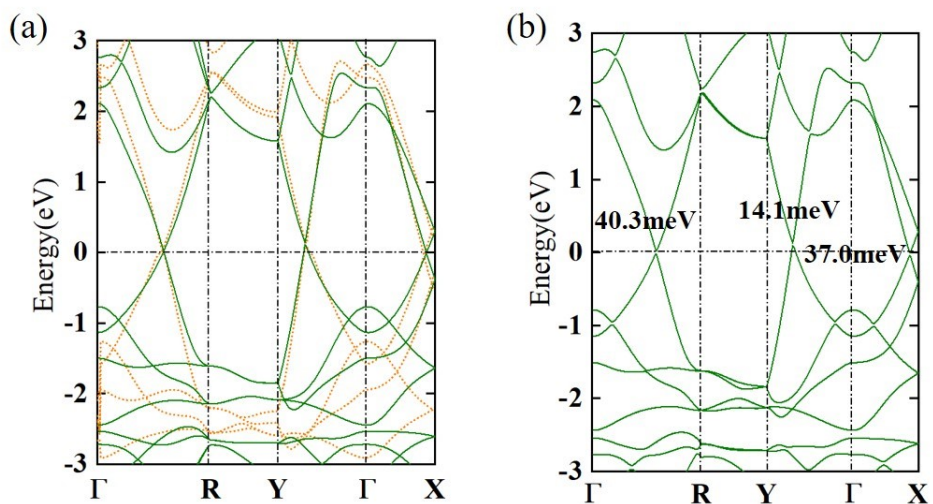

**Fig. S10** (a) Calculated band structures of NiB<sub>2</sub> monolayer by PBE+U (green solid line, U=5.1eV) and HSE06 (yellow dotted line) functionals. (b) Calculated band structure with SOC effect.

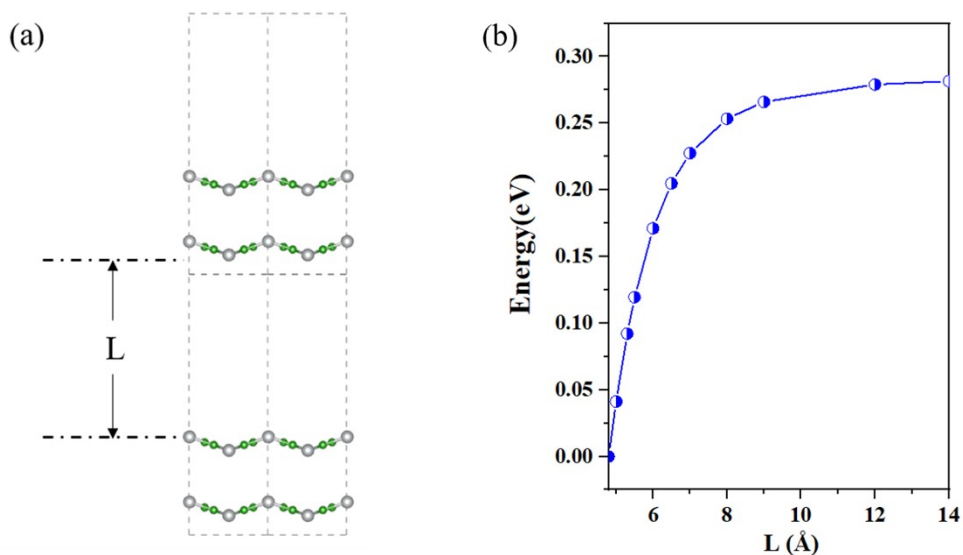

**Fig. S11** (a) Schematic diagram on the calculation of exfoliation energy. (b) Calculated exfoliation energy of NiB<sub>2</sub> monolayer.

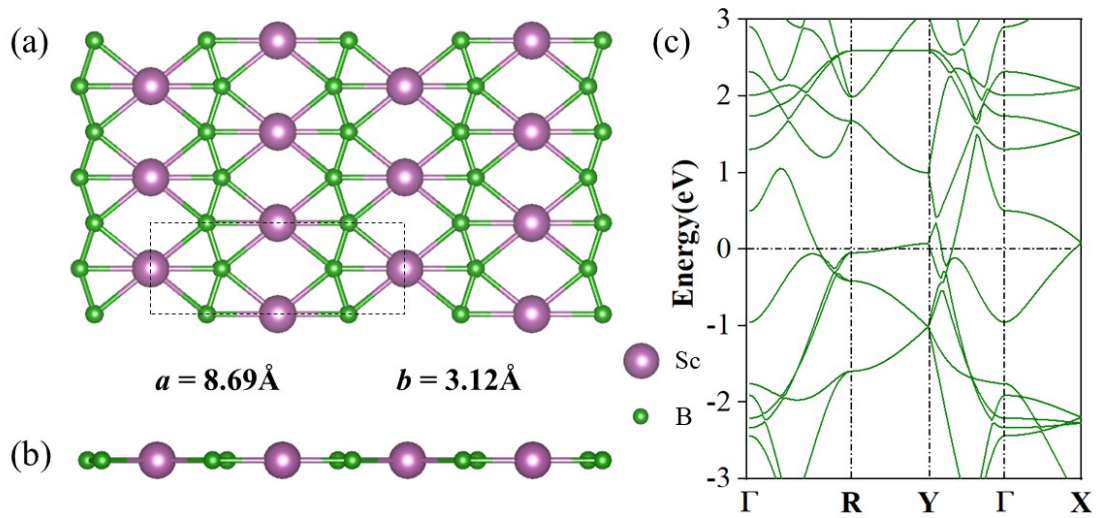

**Fig. S12** (a-b) Top and side views of geometric structure for ScB<sub>2</sub> monolayer. (c) Calculated band structure of ScB<sub>2</sub> monolayer. The spin up and down channels are degenerate.

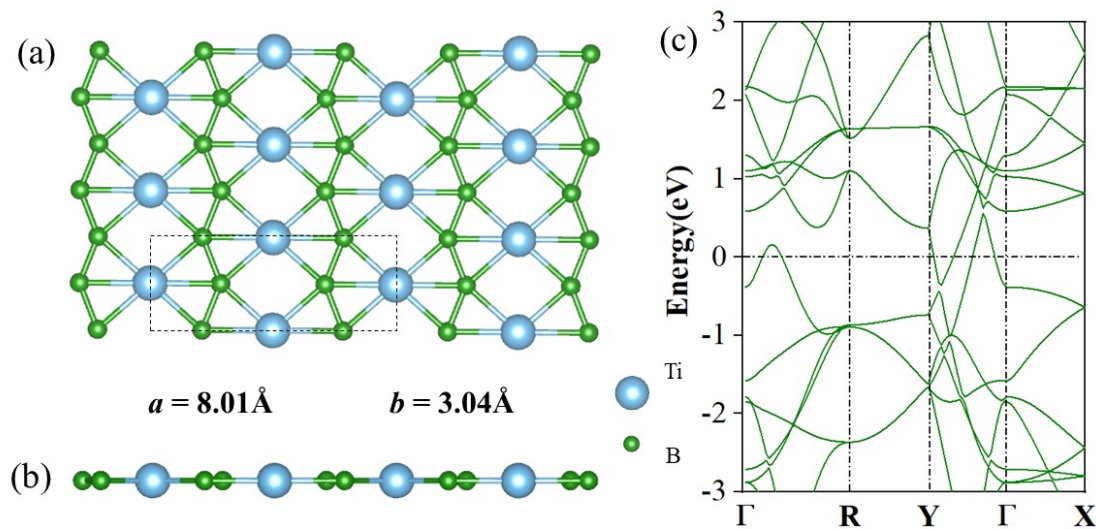

**Fig. S13** (a-b) Top and side views of geometric structure for TiB<sub>2</sub> monolayer. (c) Calculated band structure of TiB<sub>2</sub> monolayer. The spin up and down channels are degenerate.



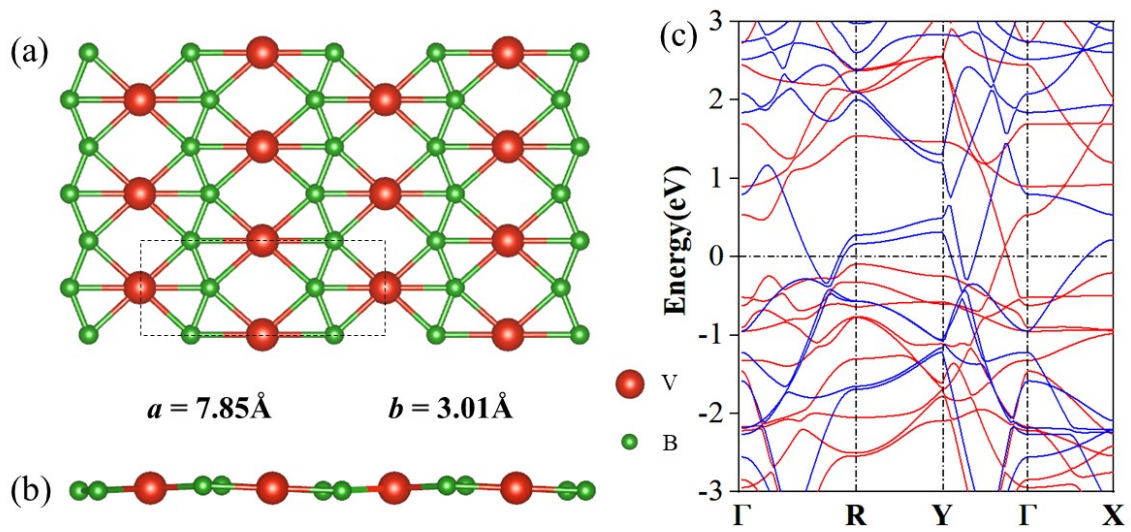

**Fig. S14** (a-b) Top and side views of geometric structure for  $\text{VB}_2$  monolayer. (c) Calculated band structure of  $\text{VB}_2$  monolayer. The red and blue lines represent spin up and down channels, respectively.

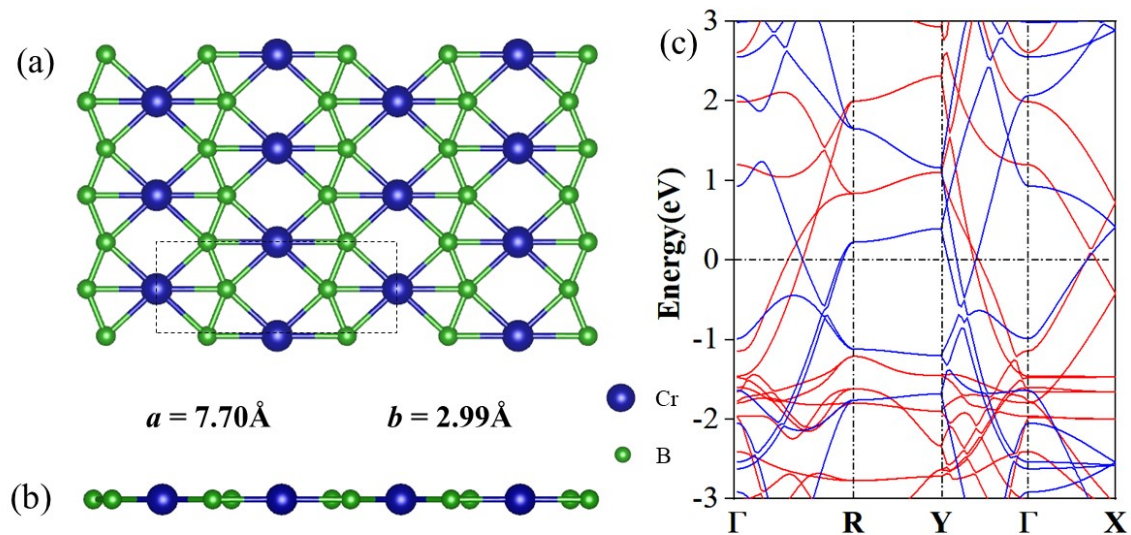

**Fig. S15** (a-b) Top and side views of geometric structure for  $\text{CrB}_2$  monolayer. (c) Calculated band structure of  $\text{CrB}_2$  monolayer. The red and blue lines represent spin up and down channels, respectively.

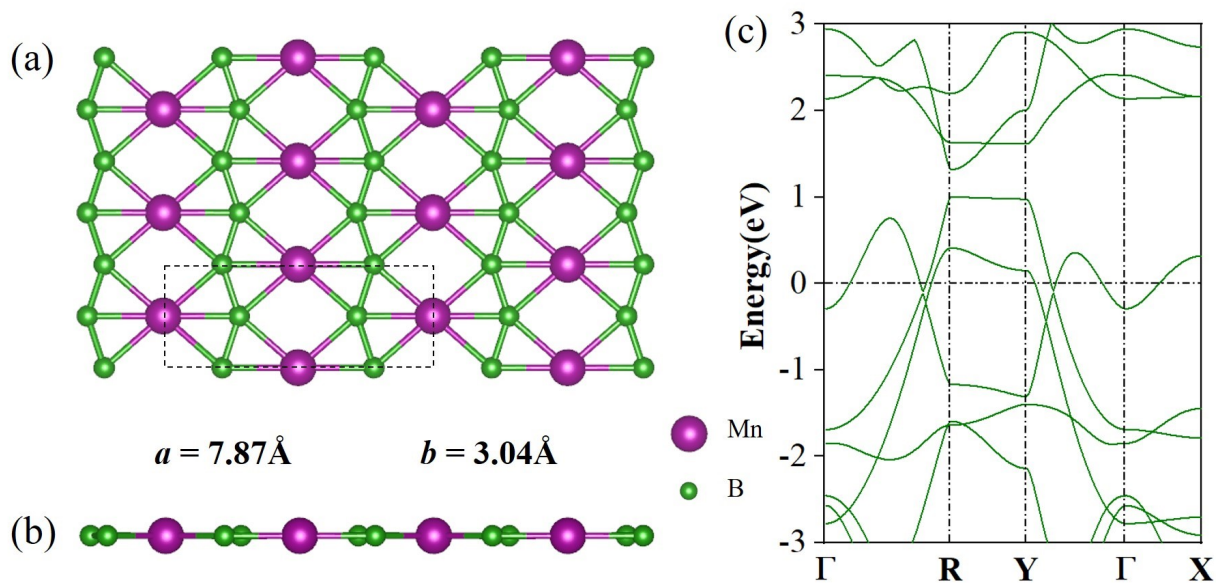

**Fig. S16** (a-b) Top and side views of geometric structure for MnB<sub>2</sub> monolayer. (c) Calculated band structure of MnB<sub>2</sub> monolayer. The spin up and down channels are degenerate.

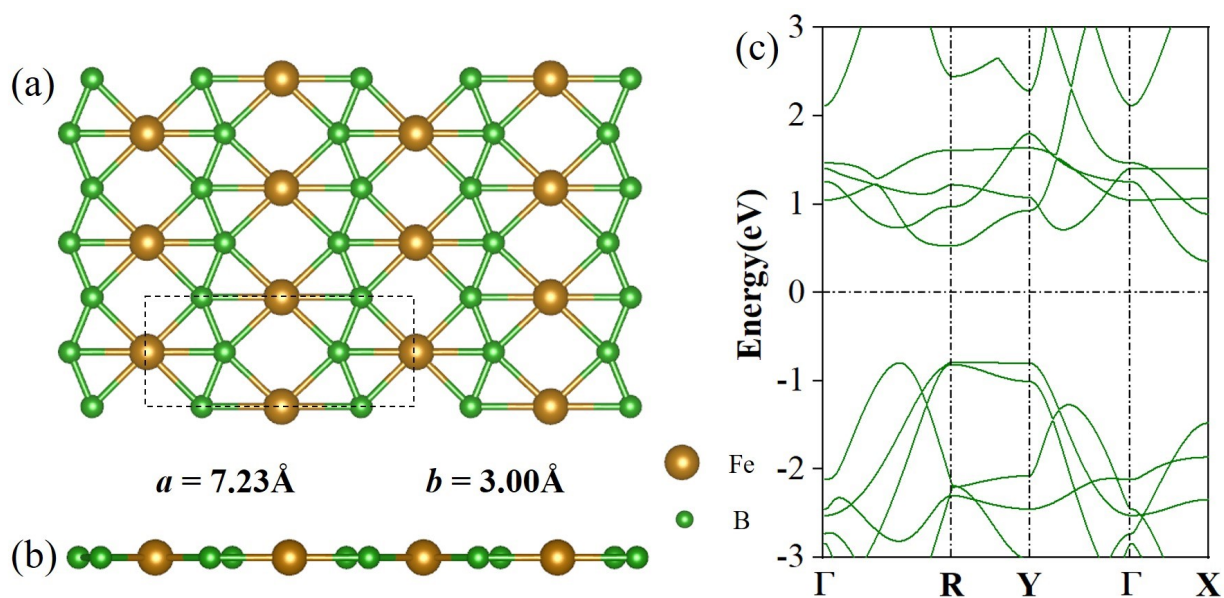

**Fig. S17** (a-b) Top and side views of geometric structure for FeB<sub>2</sub> monolayer. (c) Calculated band structure of FeB<sub>2</sub> monolayer. The spin up and down channels are degenerate.

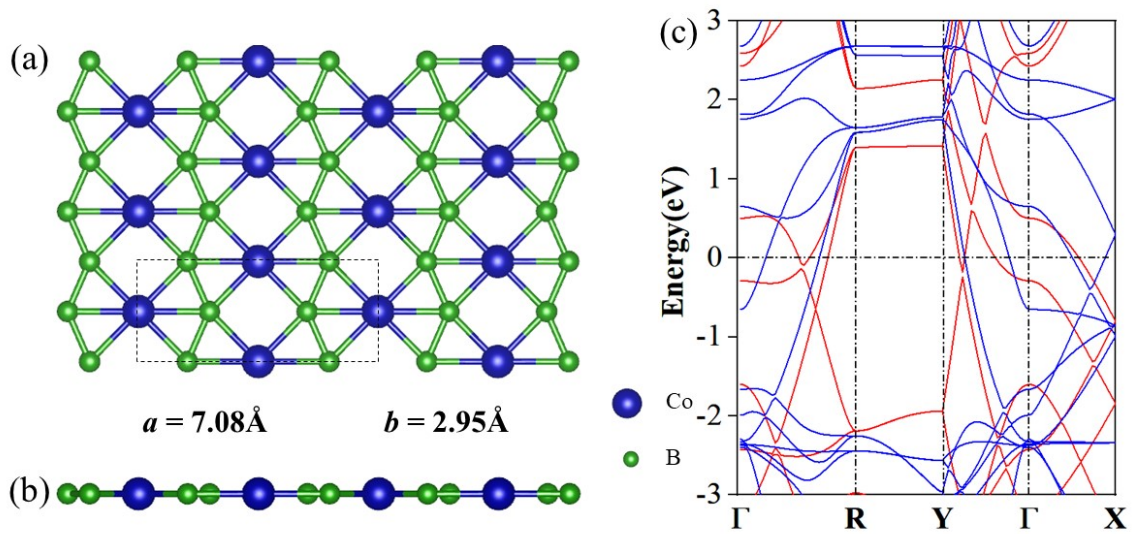

**Fig. S18** (a-b) Top and side views of geometric structure for CoB<sub>2</sub> monolayer. (c) Calculated band structure of CoB<sub>2</sub> monolayer. The red and blue lines represent spin up and down channels, respectively.

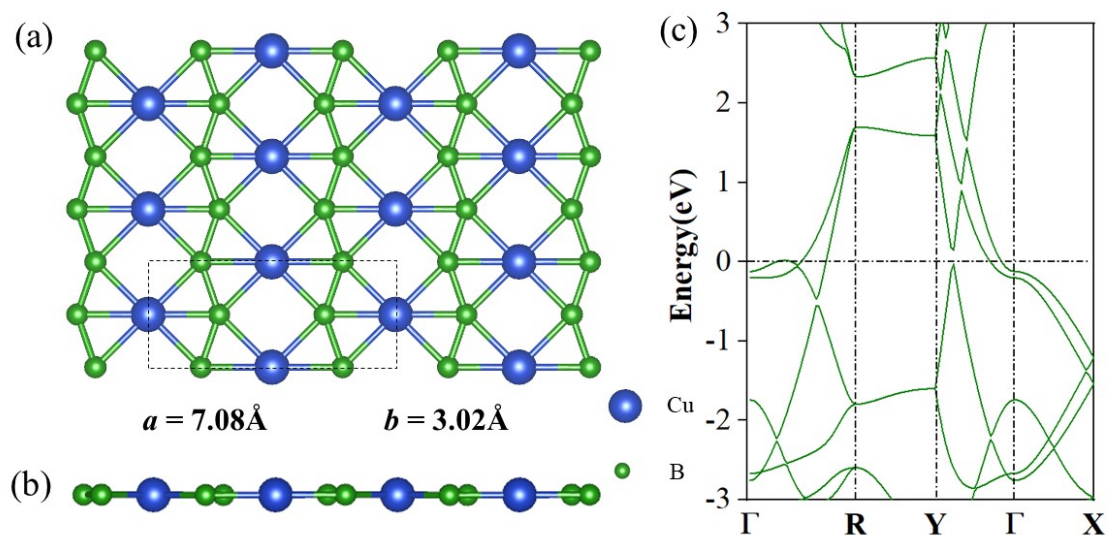

**Fig. S19** (a-b) Top and side views of geometric structure for CuB<sub>2</sub> monolayer. (c) Calculated band structure of CuB<sub>2</sub> monolayer. The spin up and down channels are degenerate.



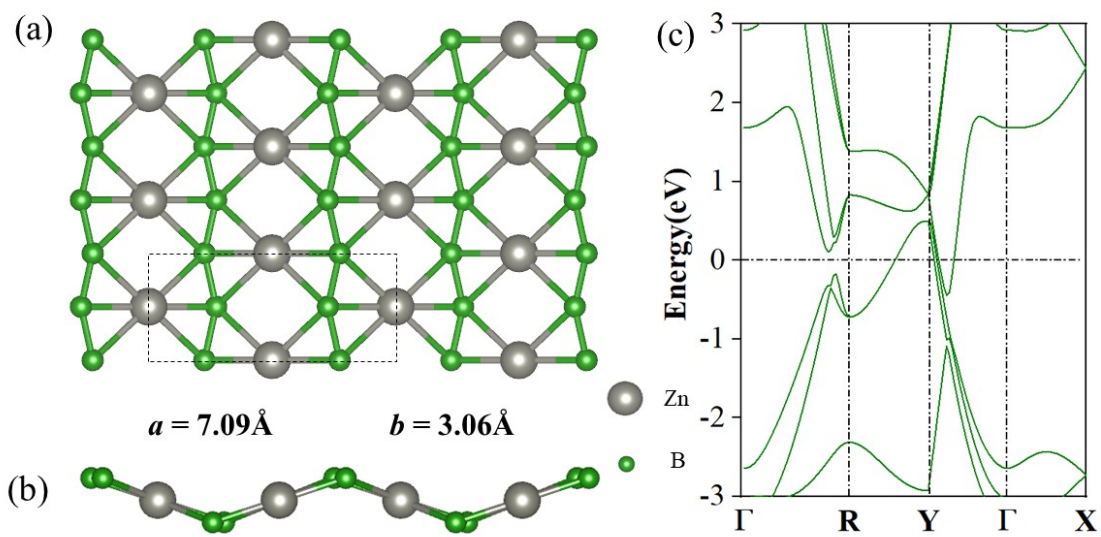

**Fig. S20** (a-b) Top and side views of geometric structure for ZnB<sub>2</sub> monolayer. (c) Calculated band structure of ZnB<sub>2</sub> monolayer. The spin up and down channels are degenerate.
